# Supplementary material for: Cell wall properties play an important role in the emergence of lateral root primordia from the parent root
Source: PubMed Central journal article supplement (PMC3991740; doi:10.1093/jxb/eru056), 2014-03-11

Figure S1. Shoot systems of eight mutants isolated based on increased lateral root formation.  
Bar = 0.5 cM.

Figure S1

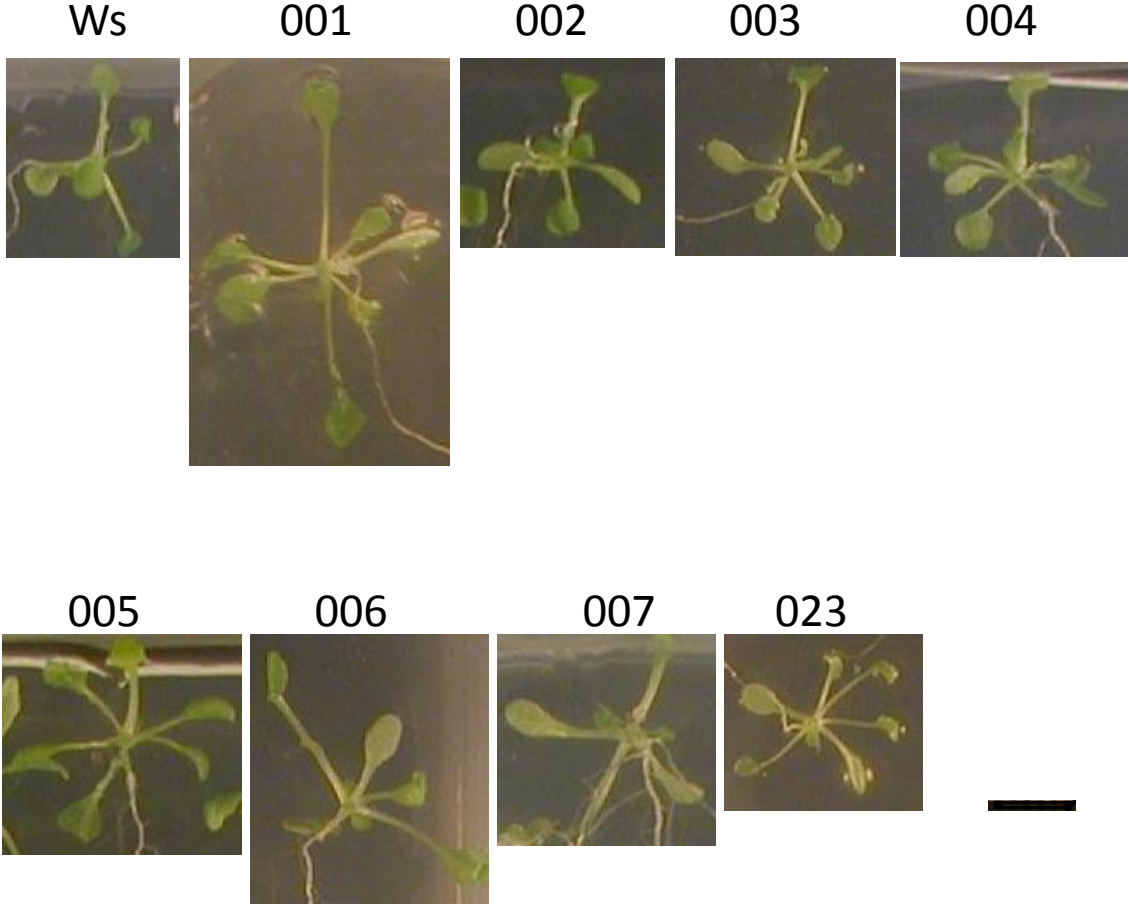

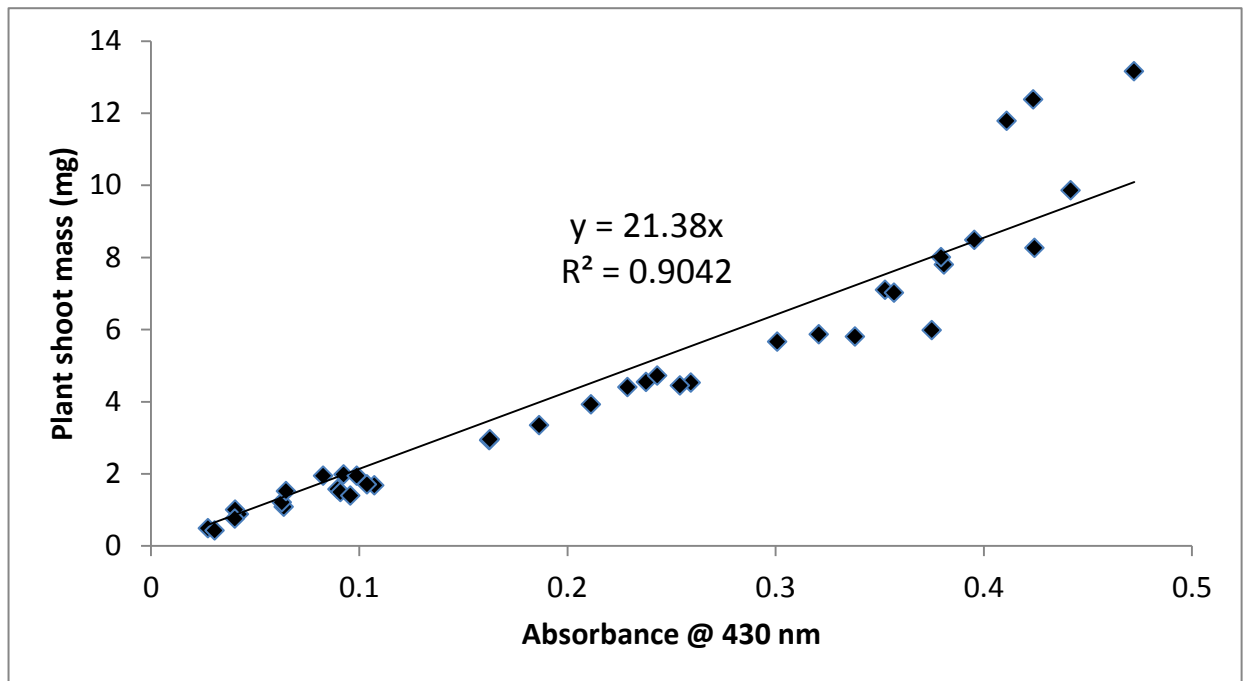

Figure S2. Correlation of plant shoot mass and absorbance of ethanol extracts.

Figure S3 Lateral root emergence in a second *lrd5* allele and after rescue.

A. Lateral root emergence in *lrd5-1*. Emergence is calculated as number of emerged lateral roots per total initiation events. The *lrd5-1* mutant shows increased lateral root emergence under repressive conditions (Students T-test,  $P=0.008$ ). B. Lateral root emergence is rescued by the LRD5:GFP construct described in the text (*lrd5R*), confirming a role for this gene in repression of emergence .

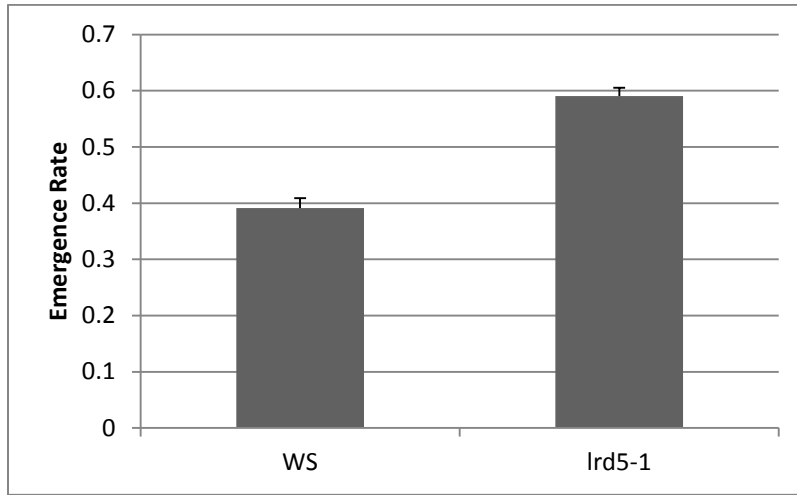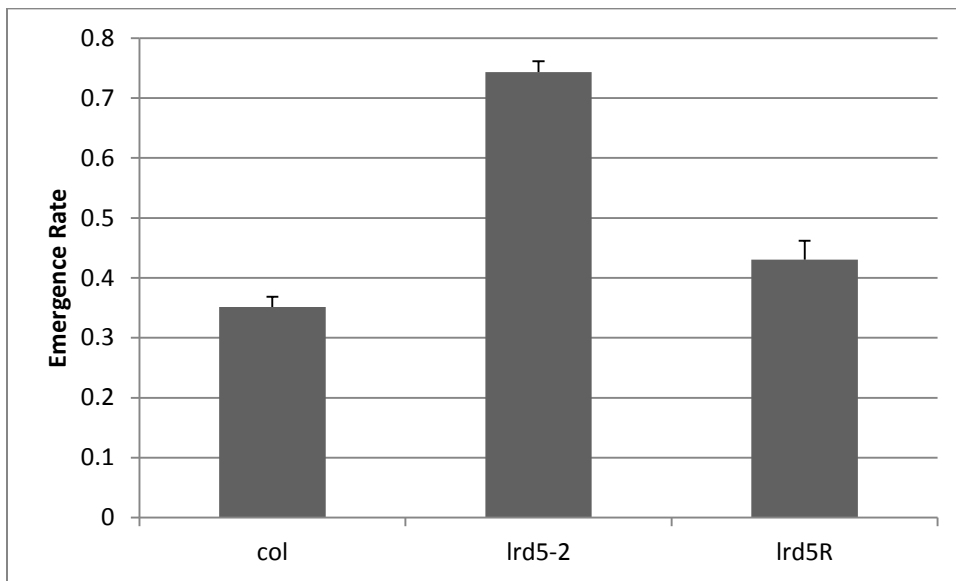

Ws

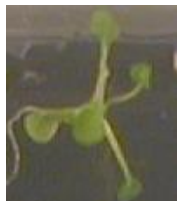

001

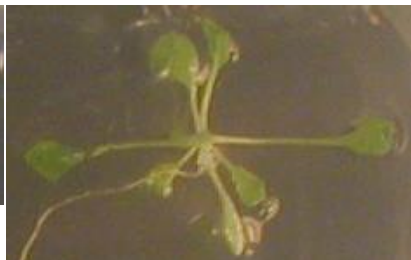

002

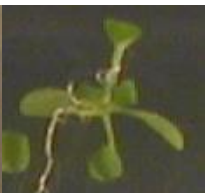

003

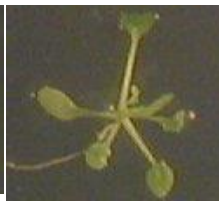

004

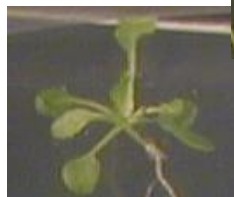

005

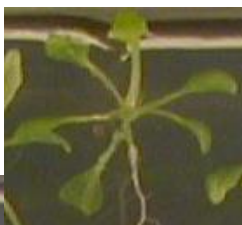

006

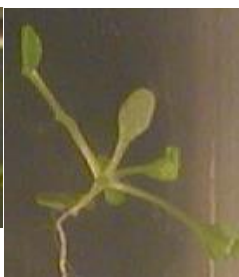

007

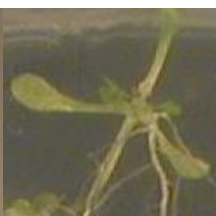

023

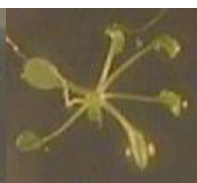

Supplement: supp_eru056_jexbot108860_file001.pdf [file supp_eru056_jexbot108860_file001.pdf]
